# Supplementary material
Source: PubMed Central journal article supplement (PMC10192159)
Supplement: NIHMS1872021-supplement-1.pdf [file NIHMS1872021-supplement-1.pdf]

## Supplemental Materials

### **Association of the time of day of peak physical activity with cardiovascular mortality:**

#### **Findings from the UK Biobank Study**

**Table S1.** Cox proportional hazards regression for the association between time of day and CVD mortality **excluding individuals who reported nightshift work.**

**Table S2.** Cox proportional hazards regression for the association between time of day and CVD mortality **excluding participants who died within two years of follow-up.**

**Table S3.** Cox proportional hazards regression for the association between time of day and CVD mortality **with further adjustment for employment and total sleep duration.**

**Table S4.** Cox proportional hazards regression for the association of time of day with **non-CVD** and **all-cause** mortality.

**Table S5. Competing risk regression analysis** of time-of-day groups and CVD mortality in the presence of a competing event (non-CVD mortality).

**Table S6.** Cox proportional hazards regression for the association between time of day and CVD mortality **based on eight clusters** (the two stable clusters were merged into one in the analysis, see **Figure S5** for illustrations of group labels).

**Figure S1.** An example of kmeans clustering for a two-dimensional dataset.

**Figure S2.** Distribution of individual physical activity volume stratified by sex (Upper Panel) and age (Lower Panel).

**Figure S3.** The association between the volume of physical activity and CVD mortality.

**Figure S4.** Diurnal patterns of physical activity by machine learning-based clustering **using a higher number of clusters (5-10 clusters).**

**Figure S5.** Group labels in sensitivity analysis (based on eight clusters with the two stable clusters merged into one. Therefore, a total of seven groups are presented in this Figure).

**Table S1.** Cox proportional hazards regression for the association between time of day and CVD mortality **excluding individuals who reported nightshift work.**

|                                        | <b>Midday Group</b><br><b>(Reference)</b> | <b>Early Morning</b><br><b>Group</b> | <b>Late Morning</b><br><b>Group</b> | <b>Night Group</b> |
|----------------------------------------|-------------------------------------------|--------------------------------------|-------------------------------------|--------------------|
| <b>Full Sample (n=90,792)</b>          |                                           |                                      |                                     |                    |
| No. of Deaths                          | 173                                       | 113                                  | 206                                 | 124                |
| No. of Participants                    | 26,751                                    | 17,755                               | 25,033                              | 21,253             |
| Hazard Ratio                           | 1 (Reference)                             | 1.53 (1.21 – 1.95)                   | 1.20 (0.98 – 1.47)                  | 1.47 (1.16 – 1.86) |
| <b>With Pre-Existing CVD (n=6,491)</b> |                                           |                                      |                                     |                    |
| No. of Deaths                          | 46                                        | 34                                   | 68                                  | 38                 |
| No. of Participants                    | 2,206                                     | 1,010                                | 2,158                               | 1,117              |
| Hazard Ratio                           | 1 (Reference)                             | 1.89 (1.21 – 2.95)                   | 1.48 (1.01 – 2.15)                  | 1.77 (1.14 – 2.75) |
| <b>Without CVD (n=84,301)</b>          |                                           |                                      |                                     |                    |
| No. of Deaths                          | 127                                       | 79                                   | 138                                 | 86                 |
| No. of Participants                    | 24,545                                    | 16,745                               | 22,875                              | 20,136             |
| Hazard Ratio                           | 1 (Reference)                             | 1.40 (1.05 – 1.86)                   | 1.11 (0.87 – 1.41)                  | 1.34 (1.02 – 1.77) |

**Table S2.** Cox proportional hazards regression for the association between time of day and CVD mortality **excluding participants who died within two years of follow-up.**

|                               | <b>Midday Group</b> | <b>Early Morning</b> | <b>Late Morning</b> | <b>Night Group</b> |
|-------------------------------|---------------------|----------------------|---------------------|--------------------|
|                               | <b>(Reference)</b>  | <b>Group</b>         | <b>Group</b>        |                    |
| <b>Full Sample (n=93,958)</b> |                     |                      |                     |                    |
| No. of Deaths                 | 142                 | 96                   | 173                 | 99                 |
| No. of Participants           | 27,642              | 18,391               | 25,542              | 22,383             |
| Hazard Ratio                  | 1 (Reference)       | 1.58 (1.22 – 2.05)   | 1.22 (0.97 – 1.52)  | 1.43 (1.10 – 1.86) |
| <b>With CVD (n=6,552)</b>     |                     |                      |                     |                    |
| No. of Deaths                 | 36                  | 28                   | 56                  | 31                 |
| No. of Participants           | 2,237               | 1,013                | 2,164               | 1,138              |
| Hazard Ratio                  | 1 (Reference)       | 1.96 (1.19 – 3.22)   | 1.54 (1.01 – 2.35)  | 1.86 (1.14 – 3.03) |
| <b>Without CVD (n=87,406)</b> |                     |                      |                     |                    |
| No. of Deaths                 | 106                 | 68                   | 117                 | 68                 |
| No. of Participants           | 25,405              | 17,378               | 23,378              | 21,245             |
| Hazard Ratio                  | 1 (Reference)       | 1.45 (1.06 – 1.97)   | 1.12 (0.86 – 1.46)  | 1.28 (0.94 – 1.74) |

**Table S3.** Cox proportional hazards regression for the association between time of day and CVD mortality **with further adjustment for employment and total sleep duration.**

|                                        | <b>Midday Group</b><br><b>(Reference)</b> | <b>Early Morning</b><br><b>Group</b> | <b>Late Morning</b><br><b>Group</b> | <b>Night Group</b> |
|----------------------------------------|-------------------------------------------|--------------------------------------|-------------------------------------|--------------------|
| <b>Full Sample (n=94,489)</b>          |                                           |                                      |                                     |                    |
| No. of Deaths                          | 175                                       | 117                                  | 208                                 | 129                |
| No. of Participants                    | 27,803                                    | 18,477                               | 25,700                              | 22,509             |
| Hazard Ratio                           | 1 (Reference)                             | 1.60 (1.26 – 2.02)                   | 1.19 (0.97 – 1.46)                  | 1.52 (1.20 – 1.91) |
| <b>With Pre-Existing CVD (n=6,672)</b> |                                           |                                      |                                     |                    |
| No. of Deaths                          | 46                                        | 34                                   | 69                                  | 41                 |
| No. of Participants                    | 2,267                                     | 1,035                                | 2,204                               | 1,166              |
| Hazard Ratio                           | 1 (Reference)                             | 1.90 (1.21 – 2.98)                   | 1.50 (1.03 – 2.19)                  | 1.92 (1.25 – 2.95) |
| <b>Without CVD (n=87,817)</b>          |                                           |                                      |                                     |                    |
| No. of Deaths                          | 129                                       | 83                                   | 139                                 | 88                 |
| No. of Participants                    | 25,536                                    | 17,442                               | 23,496                              | 21,343             |
| Hazard Ratio                           | 1 (Reference)                             | 1.48 (1.12 – 1.96)                   | 1.09 (0.86 – 1.39)                  | 1.36 (1.03 – 1.79) |

**Table S4.** Cox proportional hazards regression for the association of time of day with **non-CVD** and **all-cause** mortality.

|                                                        | <b>Midday Group</b><br><b>(Reference)</b> | <b>Early Morning</b><br><b>Group</b> | <b>Late Morning</b><br><b>Group</b> | <b>Night Group</b> |
|--------------------------------------------------------|-------------------------------------------|--------------------------------------|-------------------------------------|--------------------|
| <b>Hazard Ratios of Non-CVD Mortality (n=94,489)</b>   |                                           |                                      |                                     |                    |
| No. of Deaths                                          | 870                                       | 395                                  | 814                                 | 478                |
| No. of Participants                                    | 27,803                                    | 18,477                               | 25,700                              | 22,509             |
| Hazard Ratio                                           | 1 (Reference)                             | 1.02 (0.91 – 1.15)                   | 0.98 (0.89 – 1.07)                  | 1.02 (0.91 – 1.15) |
| <b>Hazard Ratios of All-Cause Mortality (n=94,489)</b> |                                           |                                      |                                     |                    |
| No. of Deaths                                          | 1045                                      | 512                                  | 1022                                | 607                |
| No. of Participants                                    | 27,803                                    | 18,477                               | 25,700                              | 22,509             |
| Hazard Ratio                                           | 1 (Reference)                             | 1.11 (1.0 – 1.24)                    | 1.02 (0.93 – 1.11)                  | 1.10 (0.99 – 1.22) |

**Table S5. Competing risk regression analysis** of time-of-day groups and CVD mortality in the presence of a competing event (non-CVD mortality).

|                                        | <b>Midday<br/>Group<br/>(Reference)</b> | <b>Early Morning<br/>Group</b> | <b>Late Morning<br/>Group</b> | <b>Night Group</b> |
|----------------------------------------|-----------------------------------------|--------------------------------|-------------------------------|--------------------|
| <b>Full Sample (n=94,489)</b>          |                                         |                                |                               |                    |
| No. of CVD Deaths                      | 175                                     | 117                            | 208                           | 129                |
| No. of Competing Events                | 870                                     | 395                            | 814                           | 478                |
| No. of Participants                    | 27,803                                  | 18,477                         | 25,700                        | 22,509             |
| Hazard Ratio of CVD Mortality          | 1 (Reference)                           | 1.61 (1.27 – 2.05)             | 1.22 (0.99 – 1.49)            | 1.50 (1.19 – 1.89) |
| <b>With Pre-Existing CVD (n=6,672)</b> |                                         |                                |                               |                    |
| No. of CVD Deaths                      | 46                                      | 34                             | 69                            | 41                 |
| No. of Competing Events                | 142                                     | 57                             | 136                           | 78                 |
| No. of Participants                    | 2,267                                   | 1,035                          | 2,204                         | 1,166              |
| Hazard Ratio of CVD Mortality          | 1 (Reference)                           | 1.84 (1.18 – 2.89)             | 1.50 (1.03 – 2.19)            | 1.87 (1.23 – 2.85) |
| <b>Without CVD (n=87,817)</b>          |                                         |                                |                               |                    |
| No. of CVD Deaths                      | 129                                     | 83                             | 139                           | 88                 |
| No. of Competing Events                | 728                                     | 338                            | 678                           | 400                |
| No. of Participants                    | 25,536                                  | 17,442                         | 23,496                        | 21,343             |
| Hazard Ratio of CVD Mortality          | 1 (Reference)                           | 1.50 (1.14 – 1.99)             | 1.13 (0.89 – 1.43)            | 1.35 (1.02 – 1.78) |

**Table S6.** Cox proportional hazards regression for the association between time of day and CVD mortality **based on eight clusters** (the two stable clusters were merged into one in the analysis, see **Figure S5** for illustrations of group labels).

|                               | <b>Midday</b> | <b>Early</b>   | <b>Mid-</b>    | <b>Late</b>    | <b>Afternoon</b> | <b>Night</b> | <b>Stable</b> |
|-------------------------------|---------------|----------------|----------------|----------------|------------------|--------------|---------------|
|                               | <b>Group</b>  | <b>Morning</b> | <b>Morning</b> | <b>Morning</b> | <b>Group</b>     | <b>Group</b> | <b>Group</b>  |
|                               | (Reference)   | <b>Group</b>   | <b>Group</b>   | <b>Group</b>   |                  |              |               |
| <b>Full Sample (n=94,489)</b> |               |                |                |                |                  |              |               |
| No. of Deaths                 | 76            | 48             | 84             | 85             | 64               | 30           | 242           |
| No. of Participants           | 11,654        | 8,631          | 11,382         | 9,347          | 13,288           | 9,755        | 30432         |
| Hazard Ratio                  | 1             | 1.56 (1.08     | 1.35 (0.99     | 1.36 (0.99     | 0.94 (0.68       | 1.61 (1.04   | 1.46 (1.12    |
|                               | (Reference)   | - 2.25)        | - 1.84)        | - 1.86)        | -1.32)           | - 2.49)      | - 1.89)       |



**Figure S1.** An example of kmeans clustering for a two-dimensional dataset.

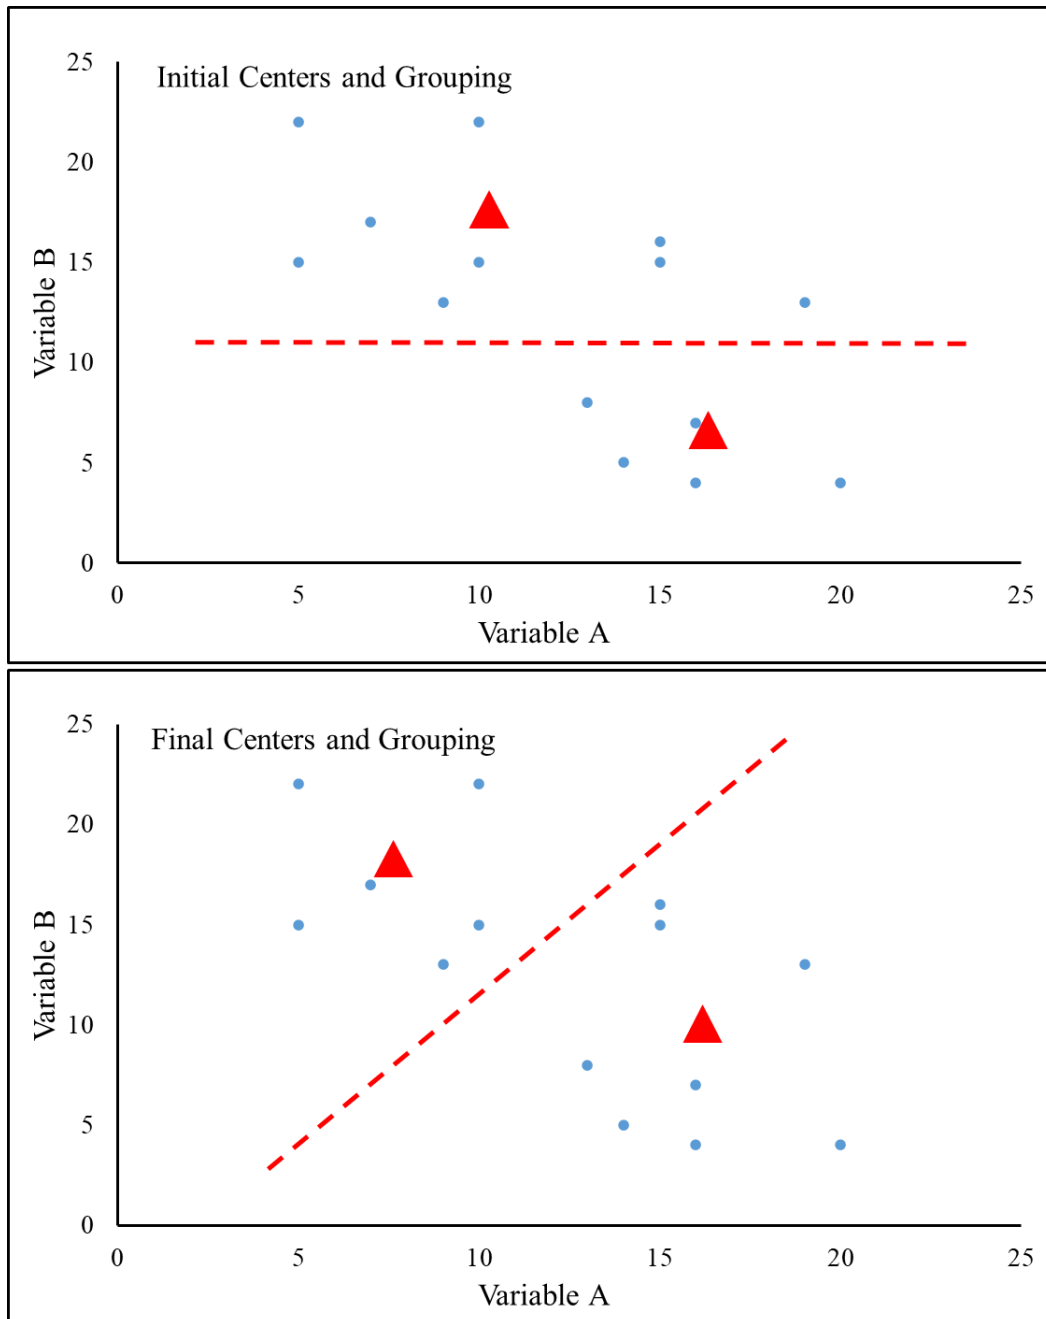

**Figure S2.** Distribution of individual physical activity volume stratified by sex (Upper Panel)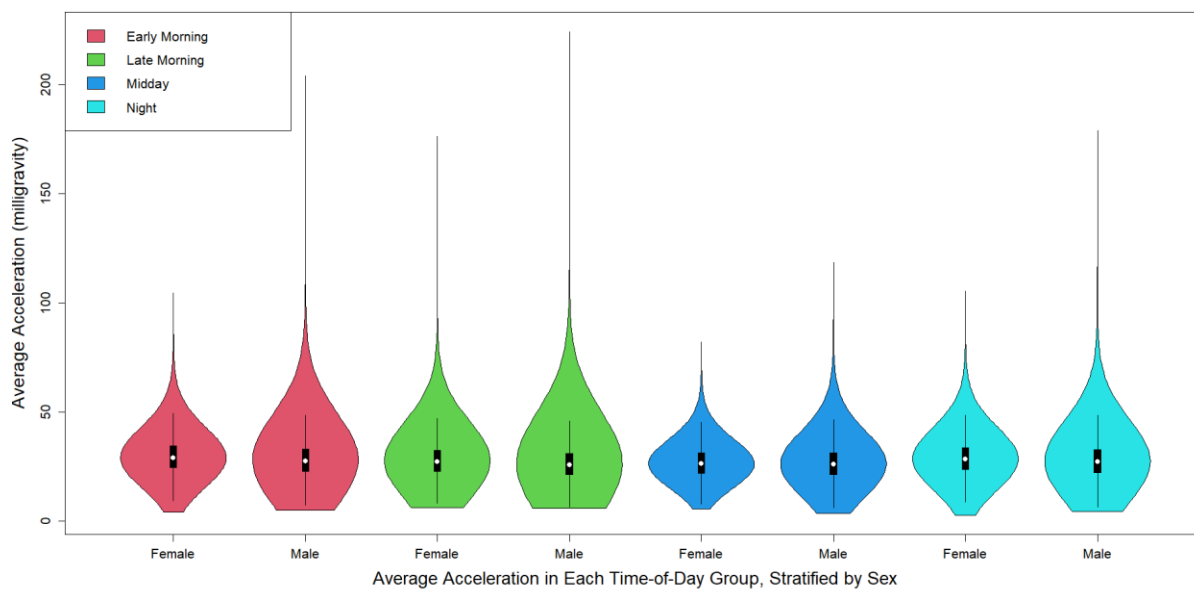

and age (Lower Panel).

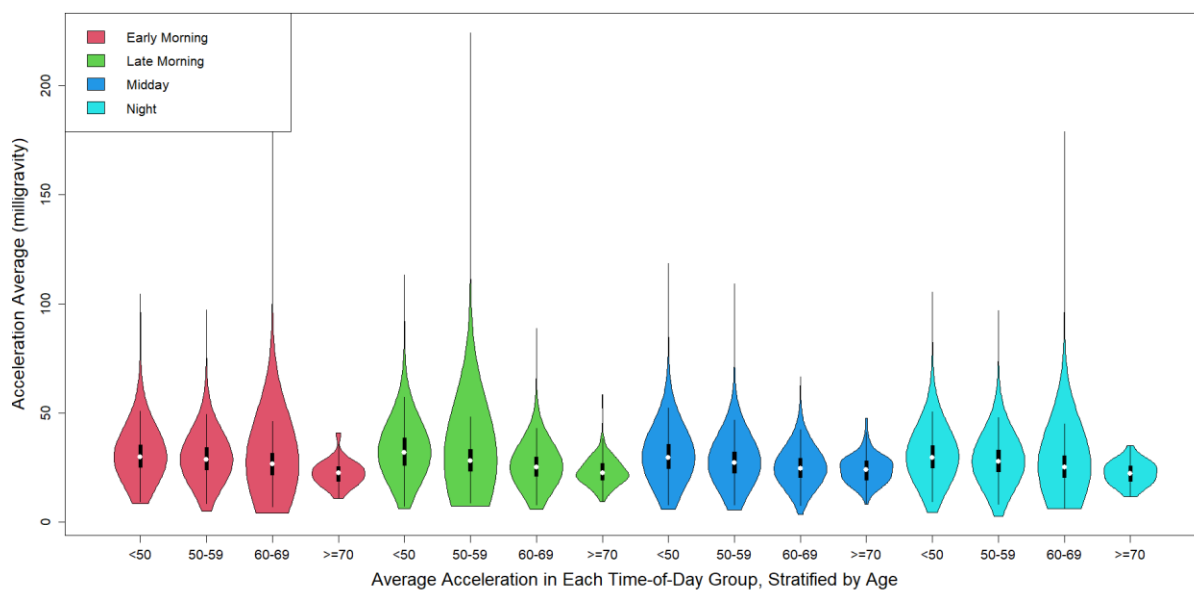

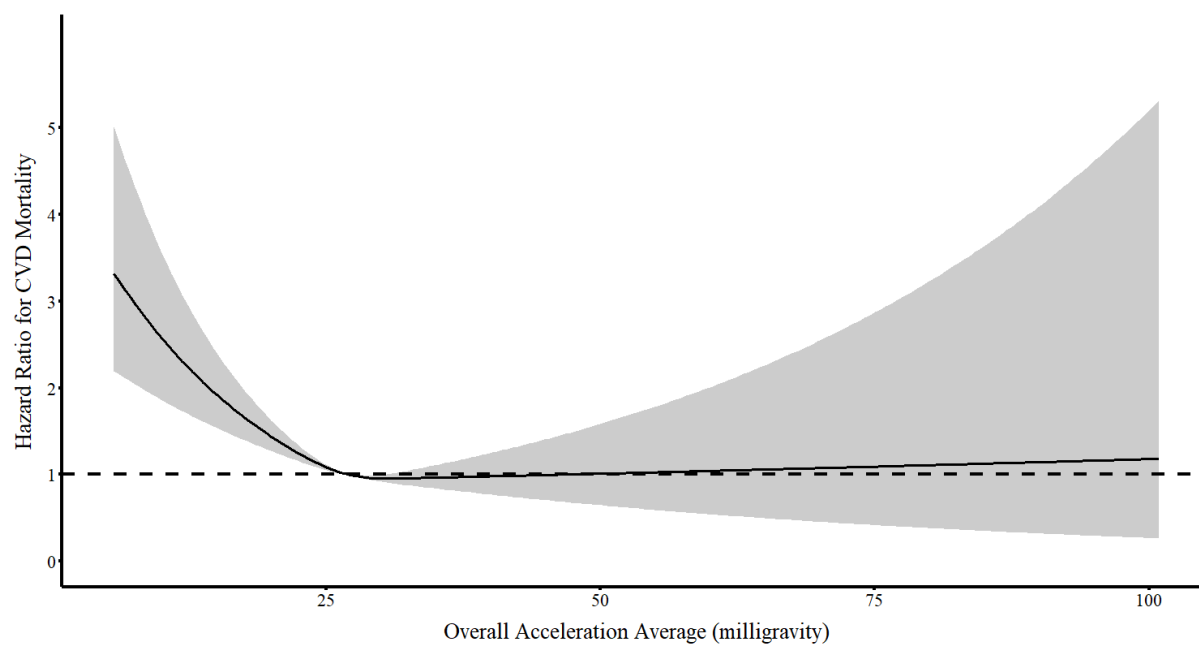

**Figure S3.** The association between the volume of physical activity and CVD mortality.

**Figure S4.** Diurnal patterns of physical activity by machine learning-based clustering **using a**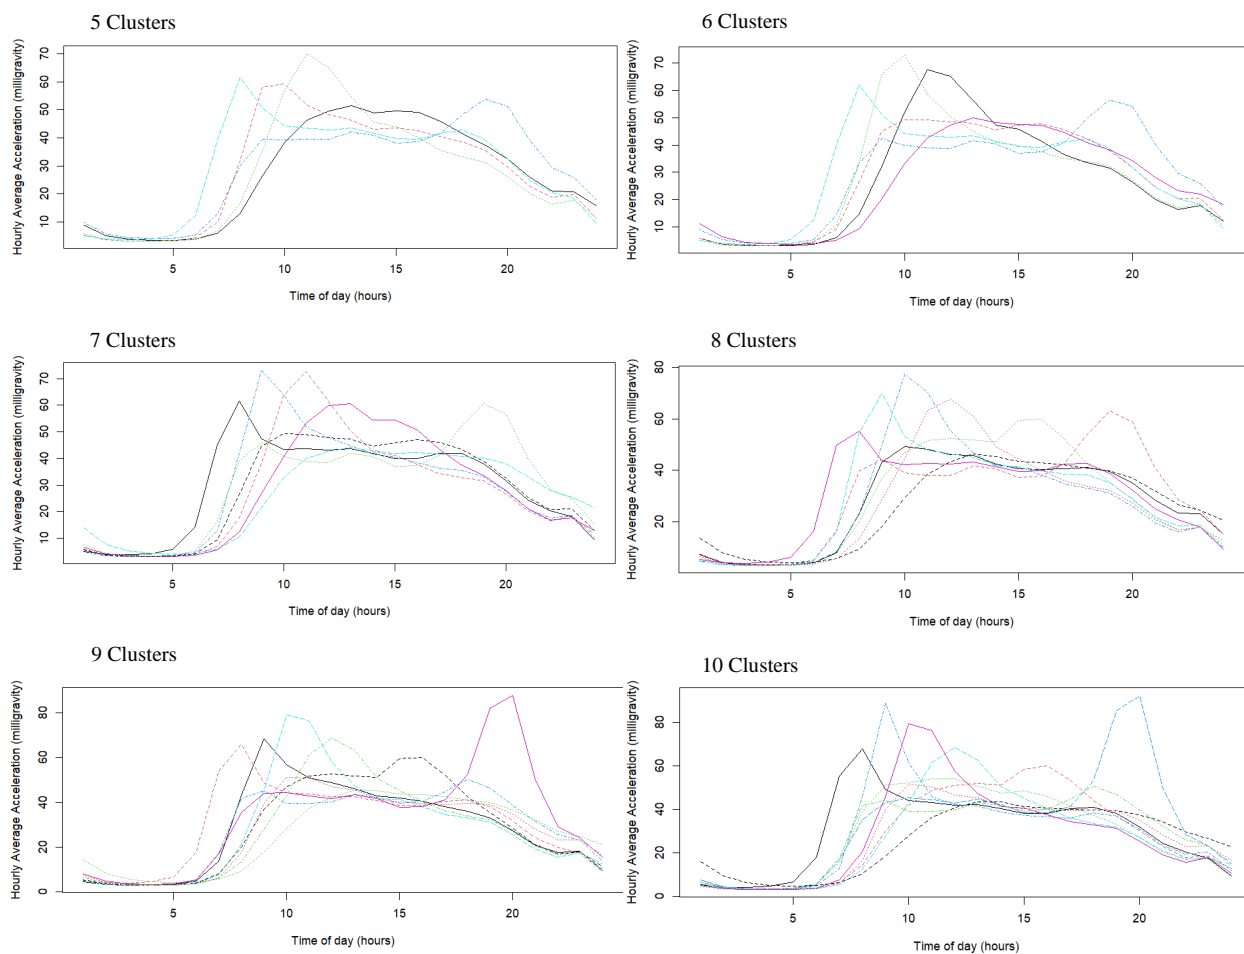

**higher number of clusters (5-10 clusters).**

**Figure S5.** Group labels in sensitivity analysis (based on eight clusters with the two stable

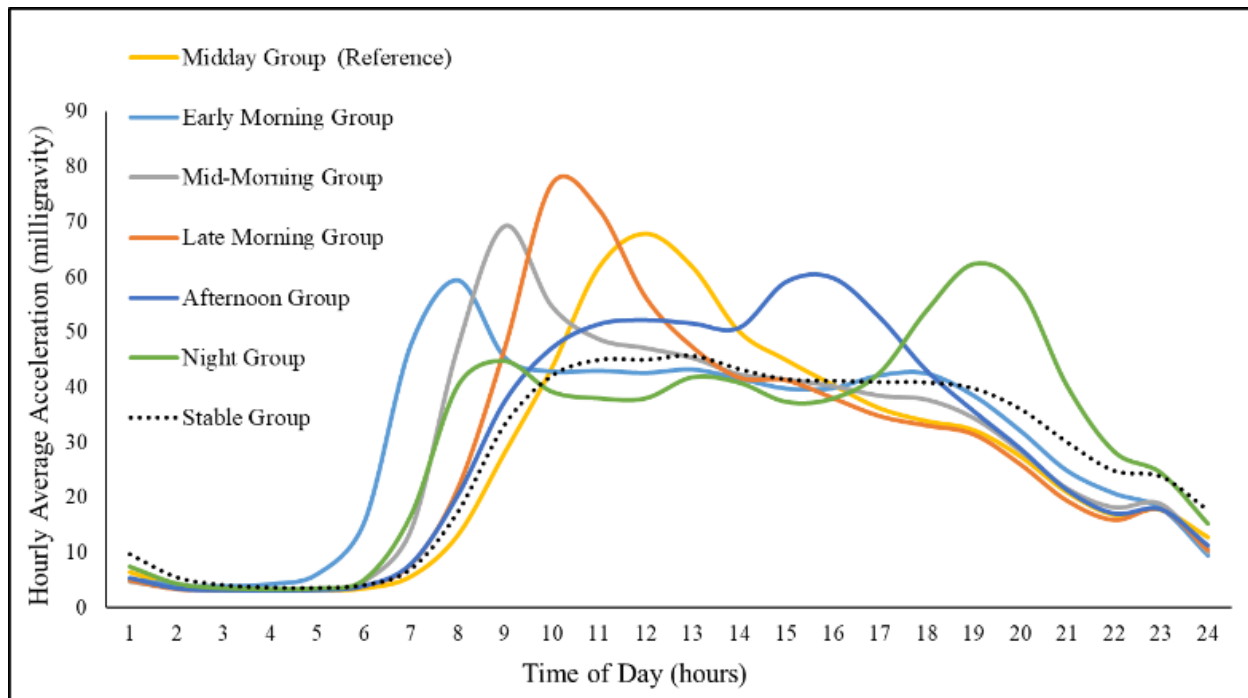

clusters merged into one. Therefore, a total of seven groups are presented in the Figure).
